# Supplementary material
Source: publisher figshare collection journal article supplement (https://sage.figshare.com/ndownloader/files/21622575)
Supplement: Supplementary file 1 [file 21622575]

| Questions |                                                                                                                                                                                                   | Study       |            |                    |                    |                    |
|-----------|---------------------------------------------------------------------------------------------------------------------------------------------------------------------------------------------------|-------------|------------|--------------------|--------------------|--------------------|
|           |                                                                                                                                                                                                   | Borse et al | Wang at al | Jiang et al (2017) | Jiang et al (2016) | Jiang et al (2015) |
| 1         | Was the study objective presented in a clear, specific, and measurable manner?                                                                                                                    | 7           | 7          | 7                  | 7                  | 7                  |
| 2         | Were the perspective of the analysis (societal, third-party payer, etc.) and reasons for its selection stated?                                                                                    | 4           | 4          | 4                  | 4                  | 4                  |
| 3         | Were variable estimates used in the analysis from the best available source (i.e., randomized control trial - best, expert opinion - worst)?                                                      | 8           | 4          | 8                  | 8                  | 8                  |
| 4         | If estimates came from a subgroup analysis, were the groups prespecified at the beginning of the study?                                                                                           | 0           | 1          | 0                  | 0                  | 1                  |
| 5         | Was uncertainty handled by (1) statistical analysis to address random events, (2) sensitivity analysis to cover a range of assumptions?                                                           | 9           | 9          | 9                  | 9                  | 9                  |
| 6         | Was incremental analysis performed between alternatives for resources and costs?                                                                                                                  | 6           | 6          | 6                  | 6                  | 6                  |
| 7         | Was the methodology for data abstraction (including the value of health states and other benefits) stated?                                                                                        | 2.5         | 5          | 2.5                | 5                  | 5                  |
| 8         | Did the analytic horizon allow time for all relevant and important outcomes? Were benefits and costs that went beyond 1 year discounted (3% to 5%) and justification given for the discount rate? | 3.5         | 7          | 7                  | 7                  | 7                  |
| 9         | Was the measurement of costs appropriate and the methodology for the estimation of quantities and unit costs clearly described?                                                                   | 4           | 8          | 8                  | 8                  | 4                  |
| 10        | Were the primary outcome measure(s) for the economic evaluation clearly stated and did they include the major short-term was justification given for the measures/scales used?                    | 6           | 6          | 6                  | 6                  | 6                  |
| 11        | Were the health outcomes measures/scales valid and reliable? If previously tested valid and reliable measures were not available, was justification given for the measures/scales used?           | 7           | 7          | 7                  | 7                  | 7                  |
| 12        | Were the economic model (including structure), study methods and analysis, and the components of the numerator and denominator displayed in a clear, transparent manner?                          | 8           | 8          | 8                  | 8                  | 8                  |
| 13        | Were the choice of economic model, main assumptions, and limitations of the study stated and justified?                                                                                           | 7           | 7          | 3.5                | 7                  | 7                  |
| 14        | Did the author(s) explicitly discuss direction and magnitude of potential biases?                                                                                                                 | 0           | 0          | 0                  | 0                  | 0                  |
| 15        | Were the conclusions/recommendations of the study justified and based on the study results?                                                                                                       | 8           | 8          | 8                  | 8                  | 8                  |
| 16        | Was there a statement disclosing the source of funding for the study?                                                                                                                             | 0           | 3          | 3                  | 3                  | 0                  |
|           | Total Points                                                                                                                                                                                      | 80          | 90         | 87                 | 93                 | 87                 |

| Questions    |                                                                                                                                                                                                   | Study       |            |              |            |                 |
|--------------|---------------------------------------------------------------------------------------------------------------------------------------------------------------------------------------------------|-------------|------------|--------------|------------|-----------------|
|              |                                                                                                                                                                                                   | Patel et al | Kazi et al | Soirch et al | Lala et al | Panattoni et al |
| 1            | Was the study objective presented in a clear, specific, and measurable manner?                                                                                                                    | 7           | 7          | 7            | 7          | 7               |
| 2            | Were the perspective of the analysis (societal, third-party payer, etc.) and reasons for its selection stated?                                                                                    | 4           | 4          | 4            | 4          | 4               |
| 3            | Were variable estimates used in the analysis from the best available source (i.e., randomized control trial - best, expert opinion - worst)?                                                      | 8           | 8          | 8            | 8          | 8               |
| 4            | If estimates came from a subgroup analysis, were the groups prespecified at the beginning of the study?                                                                                           | 1           | 1          | 1            | 1          | 1               |
| 5            | Was uncertainty handled by (1) statistical analysis to address random events, (2) sensitivity analysis to cover a range of assumptions?                                                           | 9           | 9          | 9            | 9          | 4.5             |
| 6            | Was incremental analysis performed between alternatives for resources and costs?                                                                                                                  | 6           | 6          | 6            | 6          | 6               |
| 7            | Was the methodology for data abstraction (including the value of health states and other benefits) stated?                                                                                        | 5           | 5          | 2.5          | 2.5        | 2.5             |
| 8            | Did the analytic horizon allow time for all relevant and important outcomes? Were benefits and costs that went beyond 1 year discounted (3% to 5%) and justification given for the discount rate? | 7           | 7          | 7            | 7          | 7               |
| 9            | Was the measurement of costs appropriate and the methodology for the estimation of quantities and unit costs clearly described?                                                                   | 4           | 8          | 4            | 8          | 4               |
| 10           | Were the primary outcome measure(s) for the economic evaluation clearly stated and did they include the major short-term was justification given for the measures/scales used?                    | 6           | 6          | 3            | 6          | 6               |
| 11           | Were the health outcomes measures/scales valid and reliable? If previously tested valid and reliable measures were not available, was justification given for the measures/scales used?           | 7           | 7          | 7            | 7          | 7               |
| 12           | Were the economic model (including structure), study methods and analysis, and the components of the numerator and denominator displayed in a clear, transparent manner?                          | 8           | 8          | 8            | 8          | 4               |
| 13           | Were the choice of economic model, main assumptions, and limitations of the study stated and justified?                                                                                           | 7           | 7          | 7            | 7          | 7               |
| 14           | Did the author(s) explicitly discuss direction and magnitude of potential biases?                                                                                                                 | 0           | 0          | 0            | 0          | 0               |
| 15           | Were the conclusions/recommendations of the study justified and based on the study results?                                                                                                       | 8           | 8          | 8            | 8          | 8               |
| 16           | Was there a statement disclosing the source of funding for the study?                                                                                                                             | 3           | 3          | 3            | 3          | 3               |
| Total Points |                                                                                                                                                                                                   | 90          | 94         | 84.5         | 91.5       | 79              |

| Questions    |                                                                                                                                                                                                   | Study       |               |           |
|--------------|---------------------------------------------------------------------------------------------------------------------------------------------------------------------------------------------------|-------------|---------------|-----------|
|              |                                                                                                                                                                                                   | Reese et al | Crespin et al | Kim at al |
| 1            | Was the study objective presented in a clear, specific, and measurable manner?                                                                                                                    | 7           | 7             | 7         |
| 2            | Were the perspective of the analysis (societal, third-party payer, etc.) and reasons for its selection stated?                                                                                    | 4           | 4             | 4         |
| 3            | Were variable estimates used in the analysis from the best available source (i.e., randomized control trial - best, expert opinion - worst)?                                                      | 8           | 8             | 4         |
| 4            | If estimates came from a subgroup analysis, were the groups prespecified at the beginning of the study?                                                                                           | 1           | 1             | 1         |
| 5            | Was uncertainty handled by (1) statistical analysis to address random events, (2) sensitivity analysis to cover a range of assumptions?                                                           | 9           | 9             | 9         |
| 6            | Was incremental analysis performed between alternatives for resources and costs?                                                                                                                  | 6           | 6             | 6         |
| 7            | Was the methodology for data abstraction (including the value of health states and other benefits) stated?                                                                                        | 2.5         | 5             | 5         |
| 8            | Did the analytic horizon allow time for all relevant and important outcomes? Were benefits and costs that went beyond 1 year discounted (3% to 5%) and justification given for the discount rate? | 7           | 7             | 7         |
| 9            | Was the measurement of costs appropriate and the methodology for the estimation of quantities and unit costs clearly described?                                                                   | 4           | 8             | 8         |
| 10           | Were the primary outcome measure(s) for the economic evaluation clearly stated and did they include the major short-term was justification given for the measures/scales used?                    | 3           | 3             | 6         |
| 11           | Were the health outcomes measures/scales valid and reliable? If previously tested valid and reliable measures were not available, was justification given for the measures/scales used?           | 7           | 7             | 7         |
| 12           | Were the economic model (including structure), study methods and analysis, and the components of the numerator and denominator displayed in a clear, transparent manner?                          | 8           | 8             | 8         |
| 13           | Were the choice of economic model, main assumptions, and limitations of the study stated and justified?                                                                                           | 7           | 7             | 7         |
| 14           | Did the author(s) explicitly discuss direction and magnitude of potential biases?                                                                                                                 | 6           | 3             | 0         |
| 15           | Were the conclusions/recommendations of the study justified and based on the study results?                                                                                                       | 8           | 8             | 8         |
| 16           | Was there a statement disclosing the source of funding for the study?                                                                                                                             | 0           | 3             | 0         |
| Total Points |                                                                                                                                                                                                   | 87.5        | 94            | 84        |
